# Supplementary material
Source: PubMed Central journal article supplement (PMC7101077)

### EDN1

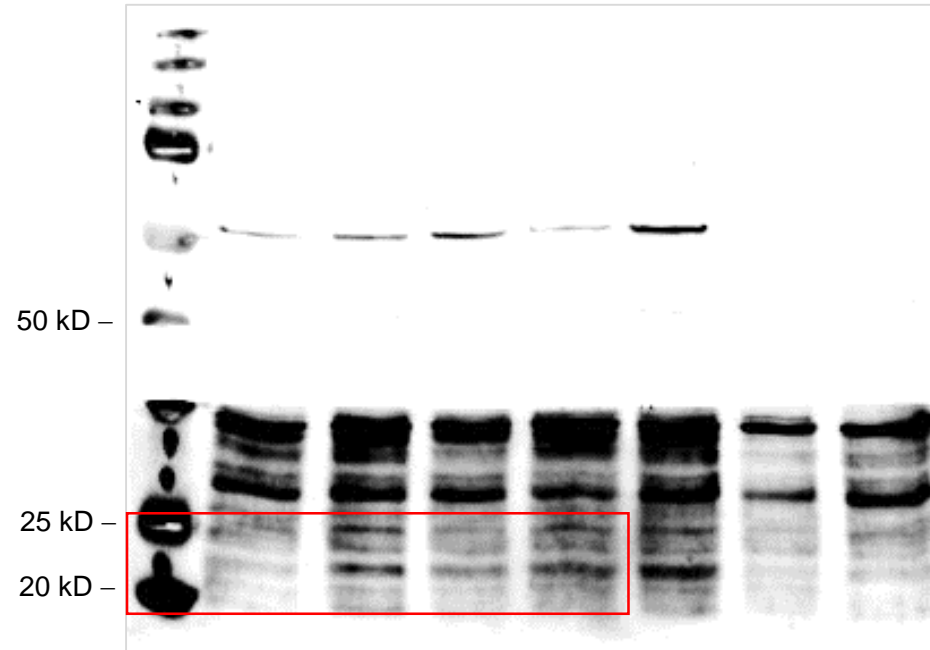

### GAPDH

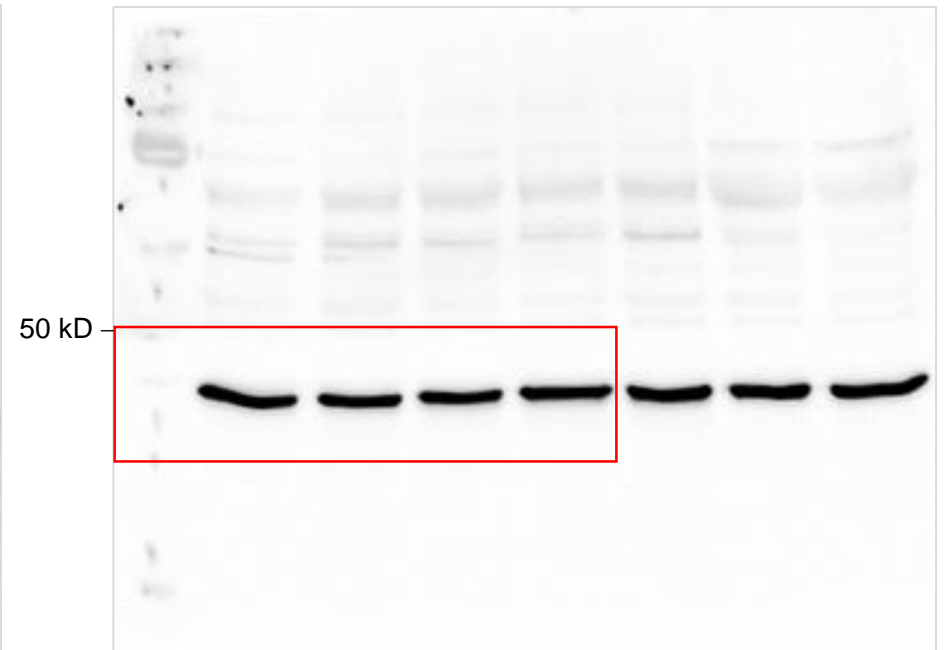

Supplement: NIHMS1549124-supplement-315259_Unedited_Figure_Gels.pdf [file NIHMS1549124-supplement-315259_Unedited_Figure_Gels.pdf]
